# Supplementary material
Source: PubMed Central journal article supplement (PMC5286928)
Supplement: 2016_158055-Disclosures_and_Contributions.pdf [file 2016_158055-Disclosures_and_Contributions.pdf]

Haematologica  
HAEMATOL/2016/158055  
Version 2

Research at the heart of hematology: thrombocytopenias and platelet  
function disorders

Carlo L. Balduini and Federica Melazzini

Disclosures: None.

Contributions: Authors contributed equally to this manuscript
